# Supplementary material for: Elevated intracellular cAMP exacerbates vulnerability to oxidative stress in optic nerve head astrocytes
Source: PubMed Central journal article supplement (PMC5833440; doi:10.1038/s41419-017-0171-8), 2018-02-19
Supplement: 41419_2017_171_MOESM4_ESM.pdf [file 41419_2017_171_MOESM4_ESM.pdf]

## Supplementary Information

### Elevated intracellular cAMP exacerbates vulnerability to oxidative stress in optic nerve head astrocytes

Myoung Sup Shim<sup>1</sup>, Keun-Young Kim<sup>2</sup>, Jung Hyun Bu<sup>1</sup>, Hye Seung Nam<sup>1</sup>, Seung Won Jeong<sup>1</sup>, Tae Lim Park<sup>1</sup>, Mark H. Ellisman<sup>2</sup>, Robert N. Weinreb<sup>1</sup>, Won-Kyu Ju<sup>1</sup>

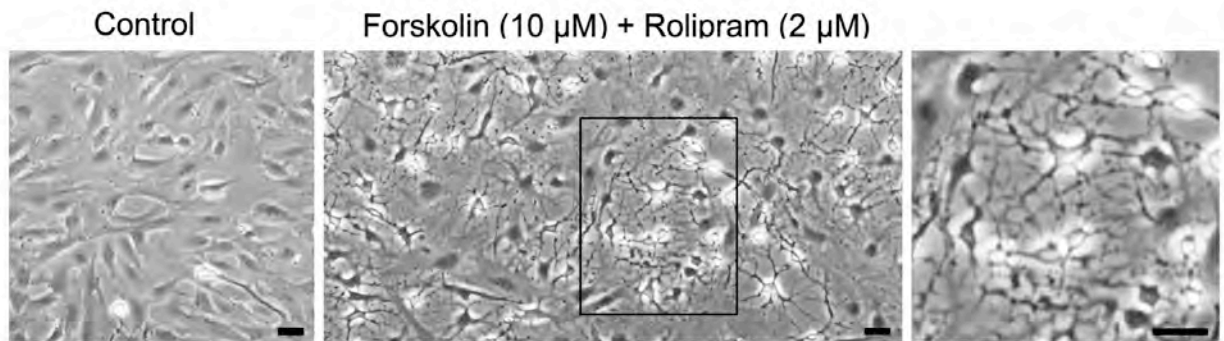

**Supplementary Figure S1. Morphological change in ONH astrocytes treated with forskolin and rolipram.** The cells were treated with forskolin and rolipram and examined under an inverted microscope and photographed after 24 h treatment. Each panel shows the morphology of the cells. Magnified images are shown in inboxes.

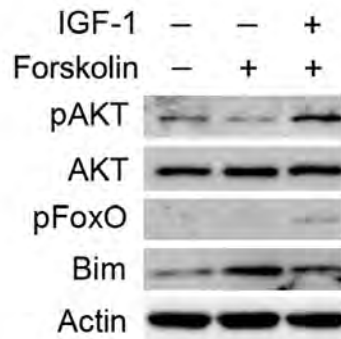

**Supplementary Figure S2. Increased expression of pAKT and pFoxO protein, but decreased expression of Bim protein in cultured ONH astrocytes.** Immunoblot analyses of pAKT, AKT, pFoxO and Bim in ONH astrocytes treated with forskolin (10  $\mu$ M) or forskolin plus IGF-1 (100 nM) for 24 h. Full-length blots are presented in Supplementary Figure S13.

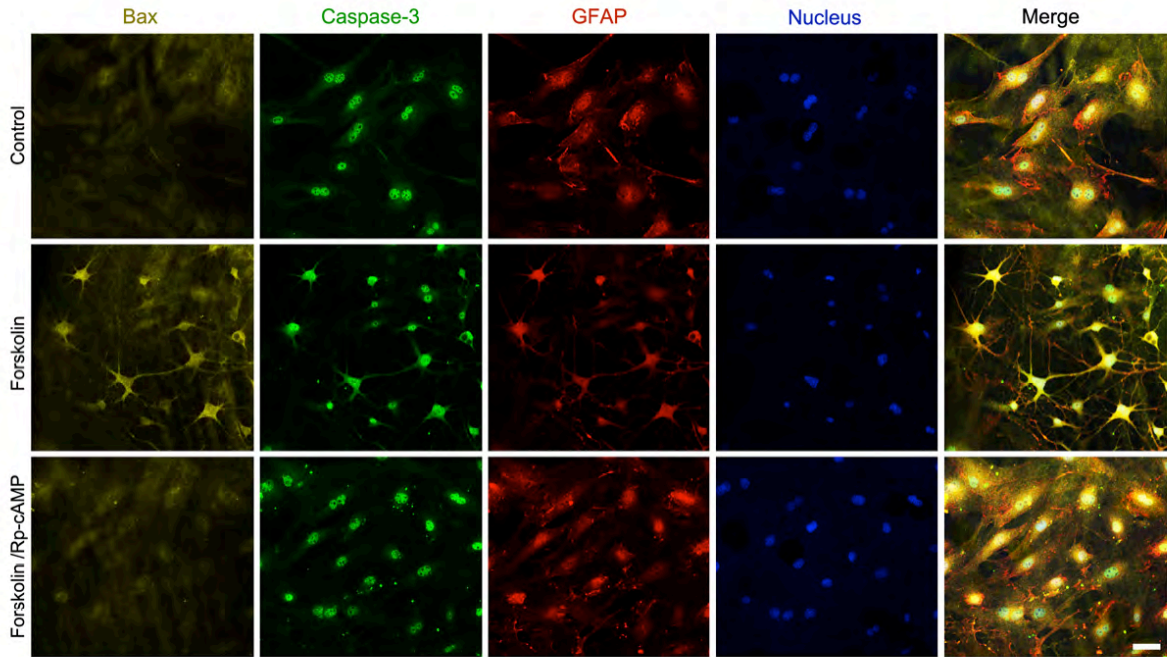

**Supplementary Figure S3. Increased expression of active Bax and caspase-3 protein in cultured ONH astrocytes.** Immunocytochemical analysis of active Bax, caspase3 and GFAP immunoreactivity in ONH astrocyte treated with forskolin (10  $\mu$ M) or forskolin (10  $\mu$ M) plus Rp-cAMP (50  $\mu$ M) for 1 h. Scale bar, 20  $\mu$ m.

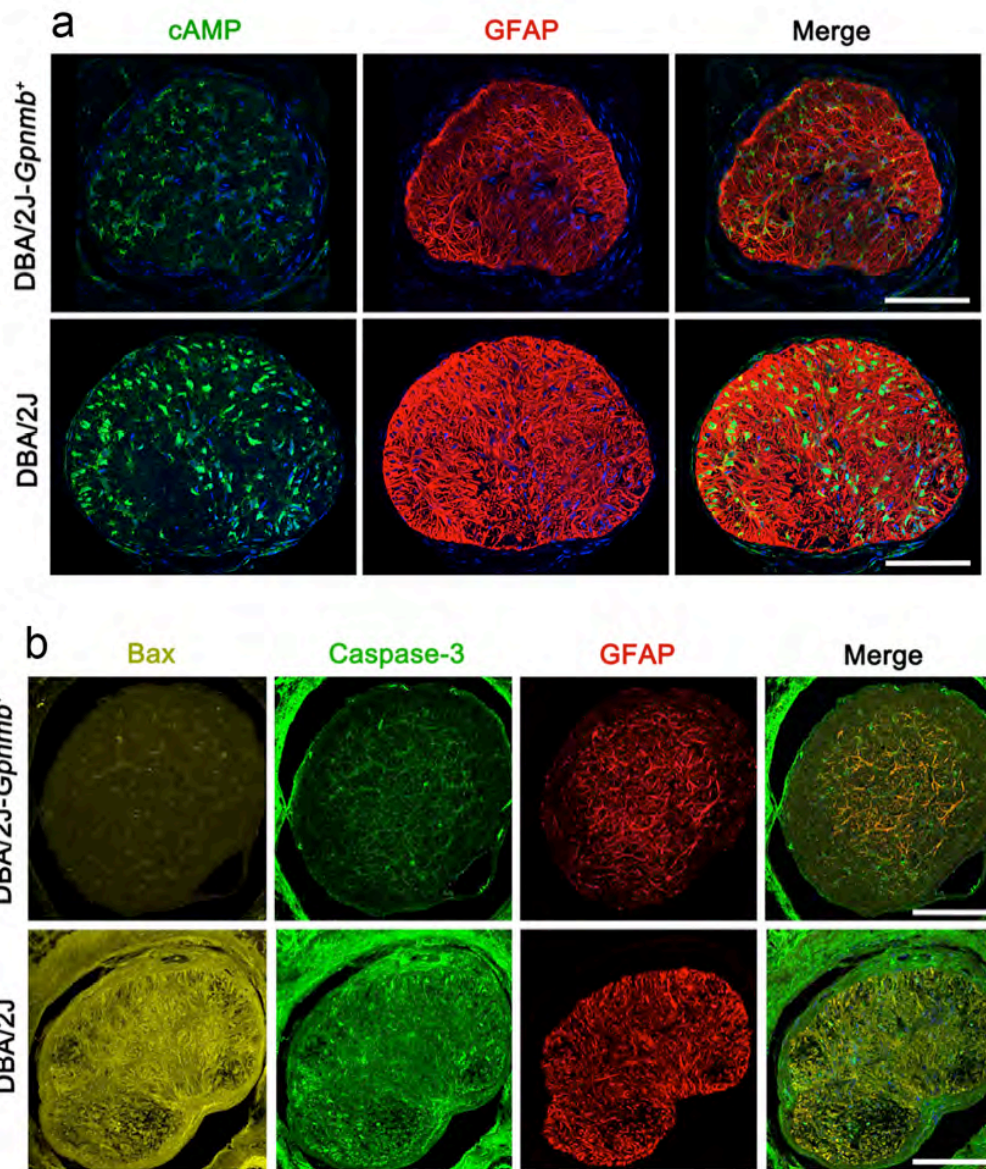

**Supplementary Figure S4. Increased cAMP as well as active Bax and caspase-3 in astrocytes of the glial lamina in glaucomatous DBA2/J mice.** Note that representative images showed increases of cAMP, Bax and caspase-3 immunoreactivity in astrocytes of the glial lamina in glaucomatous DBA/2J mice compared with non-glaucomatous DBA/2J-*Gpnmb*<sup>+</sup>. Nuclei were stained with Hoechst 33342. Scale bar, 50  $\mu$ m.

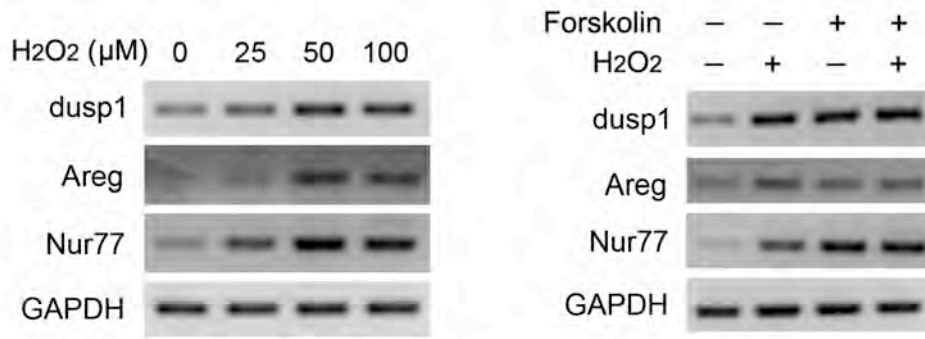

**Supplementary Figure S5. RT-PCR analysis for mRNA expression level of dusp1, Areg and Nur77 in H<sub>2</sub>O<sub>2</sub> and/or forskolin-treated ONH astrocytes.** The mRNA level of genes indicated was measured by RT-PCR and representative images from agarose gel electrophoresis of RT-PCR analyses were shown.

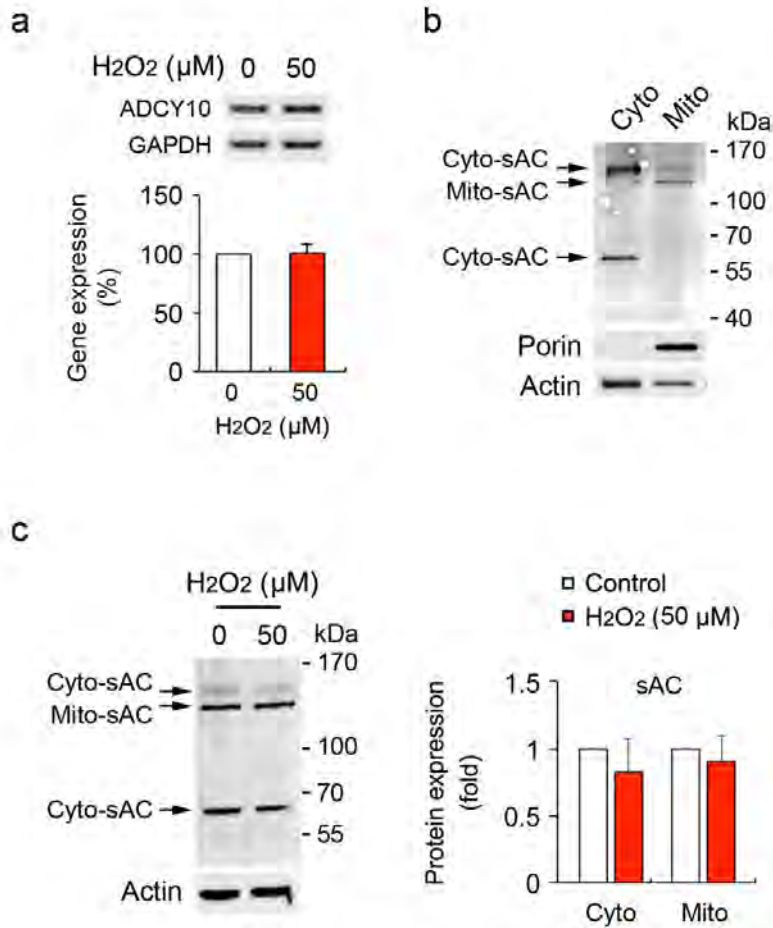

**Supplementary Figure S6. Expression of *ADCY10* gene and sAC protein in oxidative stress-induced ONH astrocytes.** (a) Real-time RT-PCR analysis of *ADCY10* gene in ONH astrocytes treated with H<sub>2</sub>O<sub>2</sub> (50 μM) for 1 h. For each determination, the gene expression in controls was normalized to a value of 1.0. (b) Immunoblot analyses of cytosolic and mitochondrial sACs in ONH astrocytes treated with H<sub>2</sub>O<sub>2</sub> (50 μM) for 1 h. For each determination, the mRNA and protein expression in controls was normalized to a value of 100% or 1.0. Data are shown as the mean ± S.D (*n* = 3).

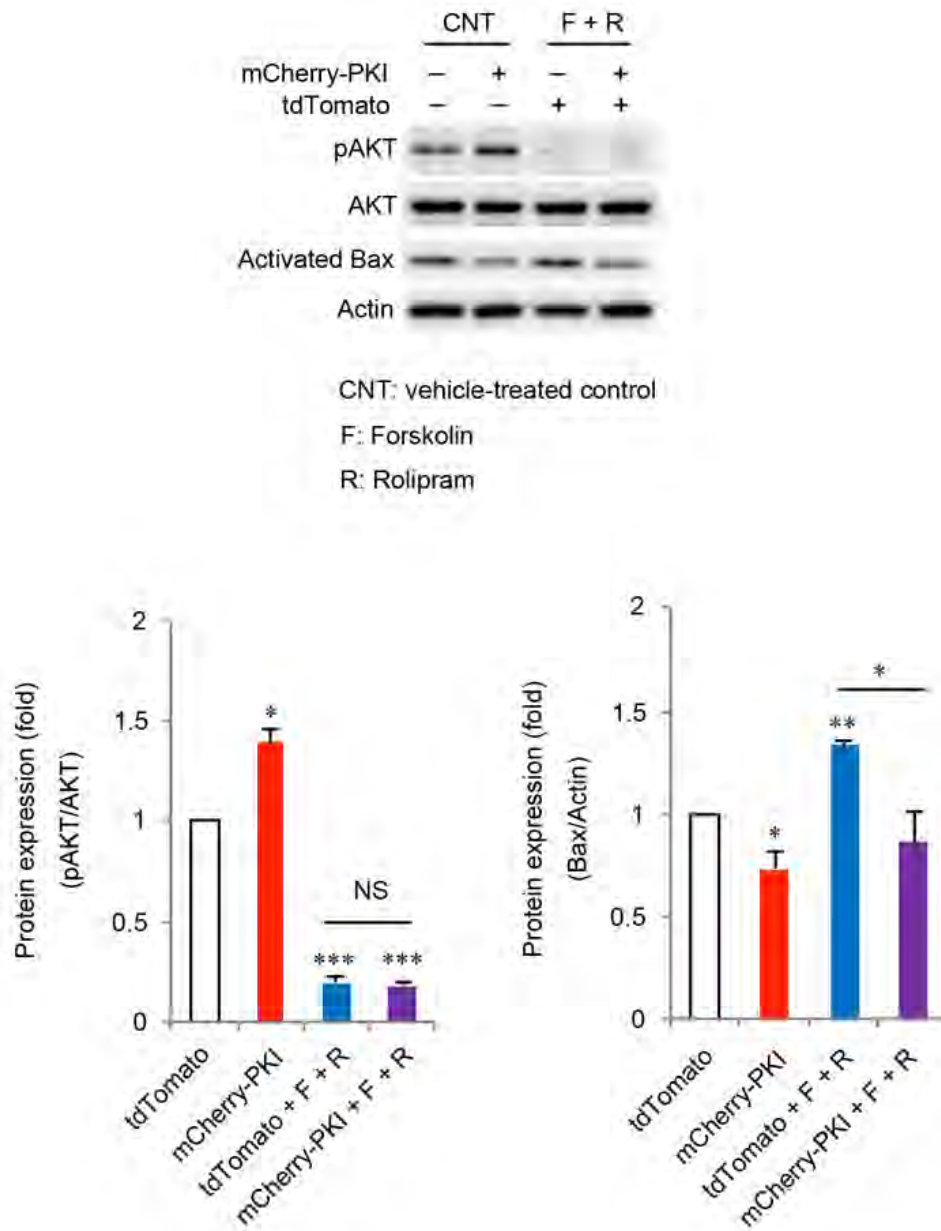

**Supplementary Figure S7. The effect of mCherry-PKI overexpression on pAkt and activated Bax expression in ONH astrocytes.** Immunoblot analyses of pAKT, AKT and activated Bax in mCherry-PKI-overexpressing ONH astrocytes in the absence or presence of forskolin (10  $\mu$ M) and rolipram (2  $\mu$ M) for 24 h. For each determination, the ratio of pAKT/AKT protein and activated Bax expression in controls was normalized to a value of 1.0. Data are shown as the mean  $\pm$  S.D ( $n = 3$ ). \* $P < 0.05$ ; \*\* $P < 0.01$ ; \*\*\* $P < 0.001$  (two-tailed unpaired Student's  $t$ -test).

## Supplementary Table S1

Primers used in the study

|                       | Forward Primer       | Reverse primer       |
|-----------------------|----------------------|----------------------|
| Adcy10                | aagggaagtcctccatctt  | cagcaaattcccctgtgtct |
| Areg                  | cggaaaaggcagaagaaaca | cttacggcggagacaaagac |
| Bcl2                  | cttcagggatgggtgaact  | atcaaacagaggctgcatgc |
| Bcl6                  | acaagacgggccacacaggt | ggtacggcttctctccagtg |
| bclxL                 | agcgtagacaaggagatgca | tcaacaaccatgccaggaga |
| Bim                   | caacaaaacccaagtctct  | accagacggaagatgaatcg |
| Bnip3                 | accacagctttggtgagaa  | cgcttggtttctcatgctg  |
| Dusp1                 | ccatctgccttgcttacctc | tgatggggctttgaaggtag |
| FasL                  | ctgaaacaaaaagccaagg  | ctggctgttgcaagactgac |
| Gapdh                 | agaacatcatccctgcatcc | gtcctcagtgtagcccagga |
| IL6                   | agttgccttcttgggactga | acagtgcacatcgctgttc  |
| Nr4a2                 | cccagtgagggtaaactca  | ccactctcttgggtccttg  |
| Nurr77                | tgttgctagagtccgccttt | cagtgatgaggaccagagca |
| Puma                  | cgtgtggaggaggaggagt  | tagttgggctccatttctgg |
| Rgs2-F                | gaggagaagcgggagaaaat | gaatgcagcaagcccatatt |
| spliced Tnf- $\alpha$ | actcgagtgacaagcccgta | gtgggtgaggagcacgtagt |
| Total Tnf- $\alpha$   | ccgatttgccatttcatacc | ccggactccgtgatgtctaa |
| Trail                 | ggatcactcggagaagcaac | agcctccttgaaccggtagt |



**Supplementary Movie 1.** Astrocyte in the glial lamina of 10-month-old DBA/2J-*Gpnmb*<sup>+</sup> mice presents an irregular arrangement of processes, which is likely a shape of hook and loop.

**Supplementary Movie 2.** Astrocyte in the glial lamina of 10-month-old glaucomatous DBA/2J mice presents a loose arrangement of astrocytic processes caused by moderate glaucoma damage.

**Supplementary Movie 3.** Astrocyte in the glial lamina of 10-month-old glaucomatous DBA/2J mice presents a significant loss of astrocytic processes caused by severe glaucoma damage.
